# Supplementary material
Source: publisher figshare collection journal article supplement (https://gsajournals.figshare.com/ndownloader/files/17710709)
Supplement: Supplementary file 1 [file 17710709]

**TABLE S1**

M**icrosatellite markers used for genotyping the X chromosome.**
